# Supplementary material for: The SARS-CoV-2 receptor-binding domain expressed in Pichia pastoris as a candidate vaccine antigen
Source: bioRxiv or medRxiv preprint supplement (doi:10.1101/2021.06.29.21259605), 2021-07-03
Supplement: Supplementary file [file media-1.pdf]

1 **Supplement S1**

2 Protein sequence

3 NWSFFSNIGGSSGGSNITNLCPFGEVFNATRFASVYAWNRKRISNCVADYSVLYNSAS

4 FSTFKCYGVSPTKLNDLCFTNVYADSFVIRGDEVQRQIAPGQTGKIADYNYKLPDDFTGC

5 VIAWNSNNLDSKVGGNLYRLFRKSNLKPFERDISTEIYQAGSTPCNGVEGFNCYF

6 PLQSYGFQPTNGVGYQPYRVVVLSFELLHAPATVCGPKKGGSGGSSSSSSSSSSSIEH

7 HHHHH
